# Supplementary material for: Cefonicid Benzathine Salt: A Convenient, Lean, and High-Performance Protocol to Make an Old Cephalosporin Shine
Source: MDPI journal article supplement (doi:10.3390/antibiotics11081095), 2022-08-12

## Supplementary Materials

# Cefonicid Benzathine Salt: A Convenient, Lean, and High-Performance Protocol to Make an Old Cephalosporin Shine

Marziale Comito 1,2 , Riccardo Monguzzi 2, Silvia Tagliapietra 1 , Giovanni Palmisano 3

and Giancarlo Cravotto 1,\*

1 Dipartimento di Scienza e Tecnologia del Farmaco, University of Turin, Via Pietro Giuria 9, 10125 Turin, Italy

2 Research and Development, ACS Dobfar SpA, Via Paullo 9, 20067 Tribiano, Italy

3 Dipartimento di Scienza e Alta Tecnologia, University of Insubria, Via Valleggio 9, 22100 Como, Italy

\* Correspondence: [giancarlo.cravotto@unito.it](mailto:giancarlo.cravotto@unito.it); Tel.: +39-011-6707183

### Figure captions

**Figure S1:** IC analysis of cefonicid benzathine salt (6).

**Figure S2.** Mother liquor LC-MS analysis to determinate benzathine formilate (7).

**Figure S3.** *O*-Formyl-(*R*)-mandelic acid LC-MS analysis.

**Figure S4.** <sup>1</sup>H-NMR of cefonicid benzathine salt (6).

**Figure S5.** <sup>13</sup>C-NMR of cefonicid benzathine salt (6).

**Figure S6.** <sup>1</sup>H-NMR of 7-SACA (4).

**Figure S7.** <sup>13</sup>C-NMR of 7-SACA (4).

Figure S1

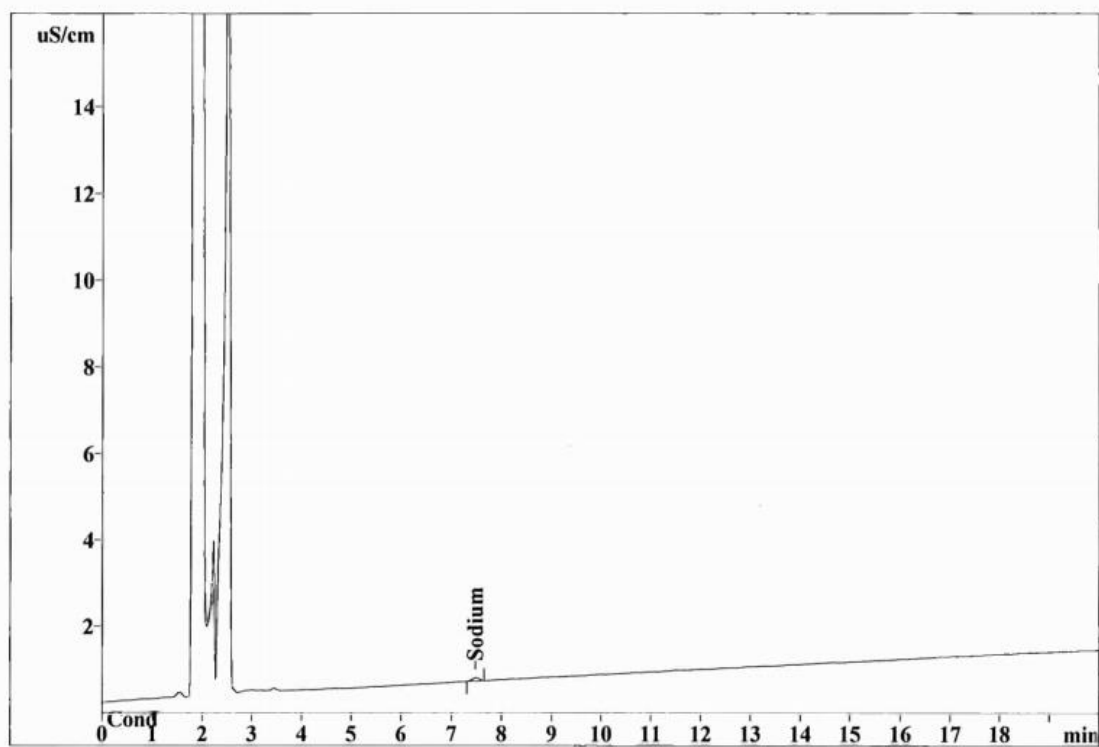

Quantitation method: Custom

| No | Retention<br>min | Height<br>uS/cm | Area<br>uS/cm*sec | RF    | Conc.<br>mg/L | Name   |
|----|------------------|-----------------|-------------------|-------|---------------|--------|
| 1  | 7.48             | 0.08            | 0.734             | 4.088 | 687.658       | Sodium |

Figure S2

C:\Xcalibur\data\Prova\27012200 1/27/2022 10:55:59 AM AM MC 004/21 (900mg a 10ml in Acqua)  
RT: 0.00 - 40.05

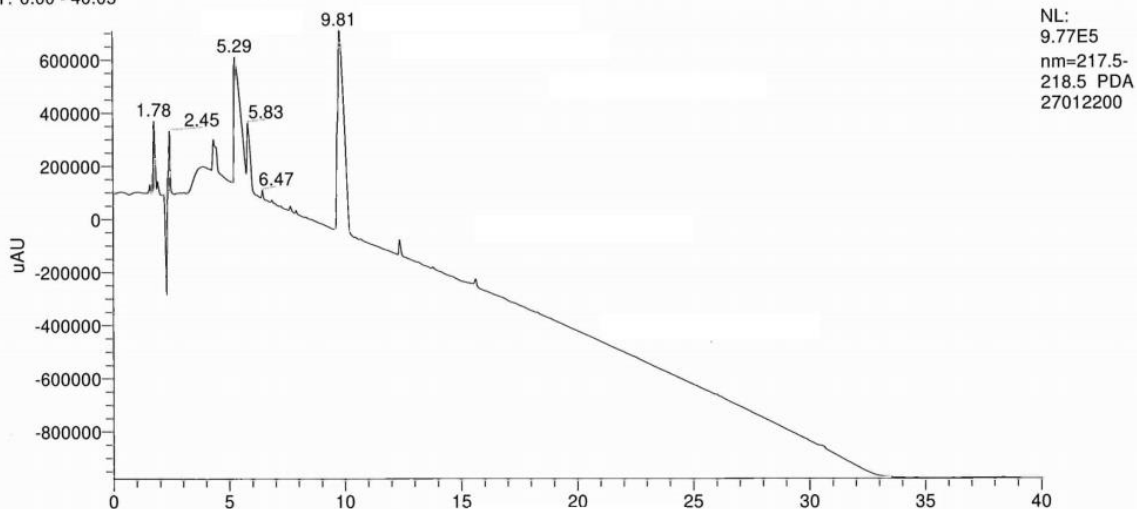

RT: 0.00 - 40.00 SM: 15G

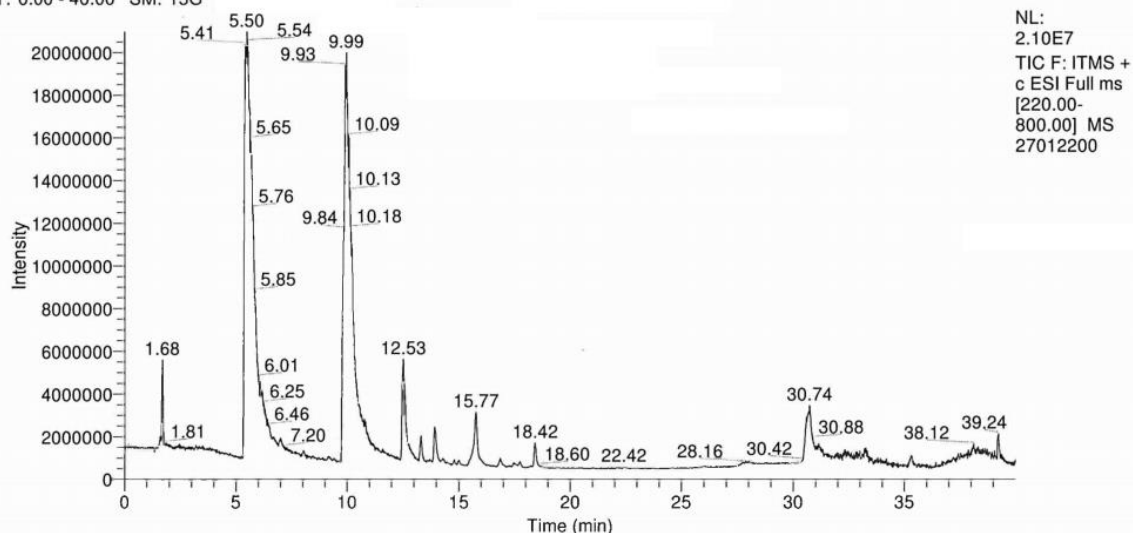

27012200 #5249 RT: 10.02 AV: 1 NL: 7.25E6  
F: ITMS + c ESI Full ms [220.00-800.00]

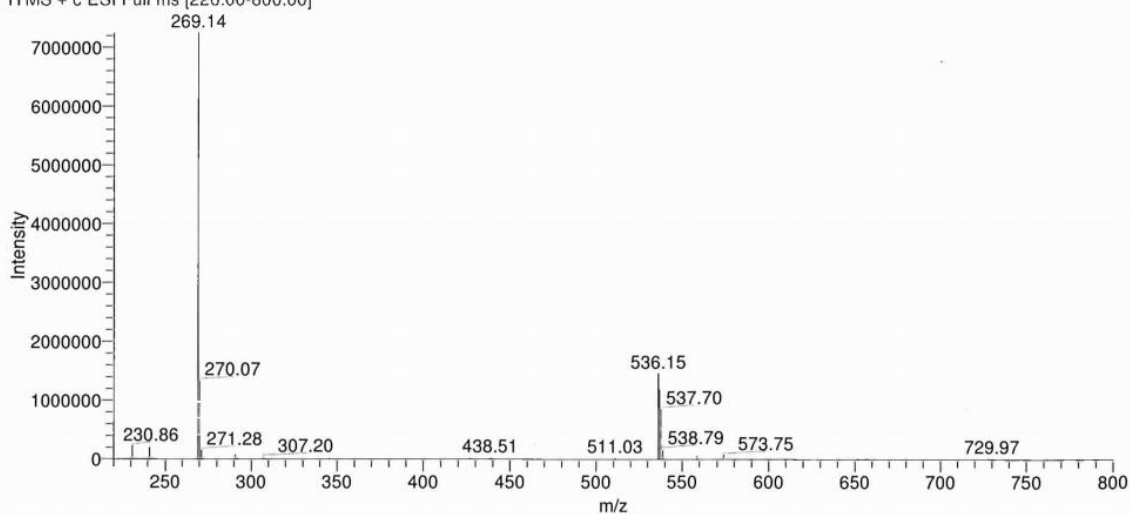

Figure S3

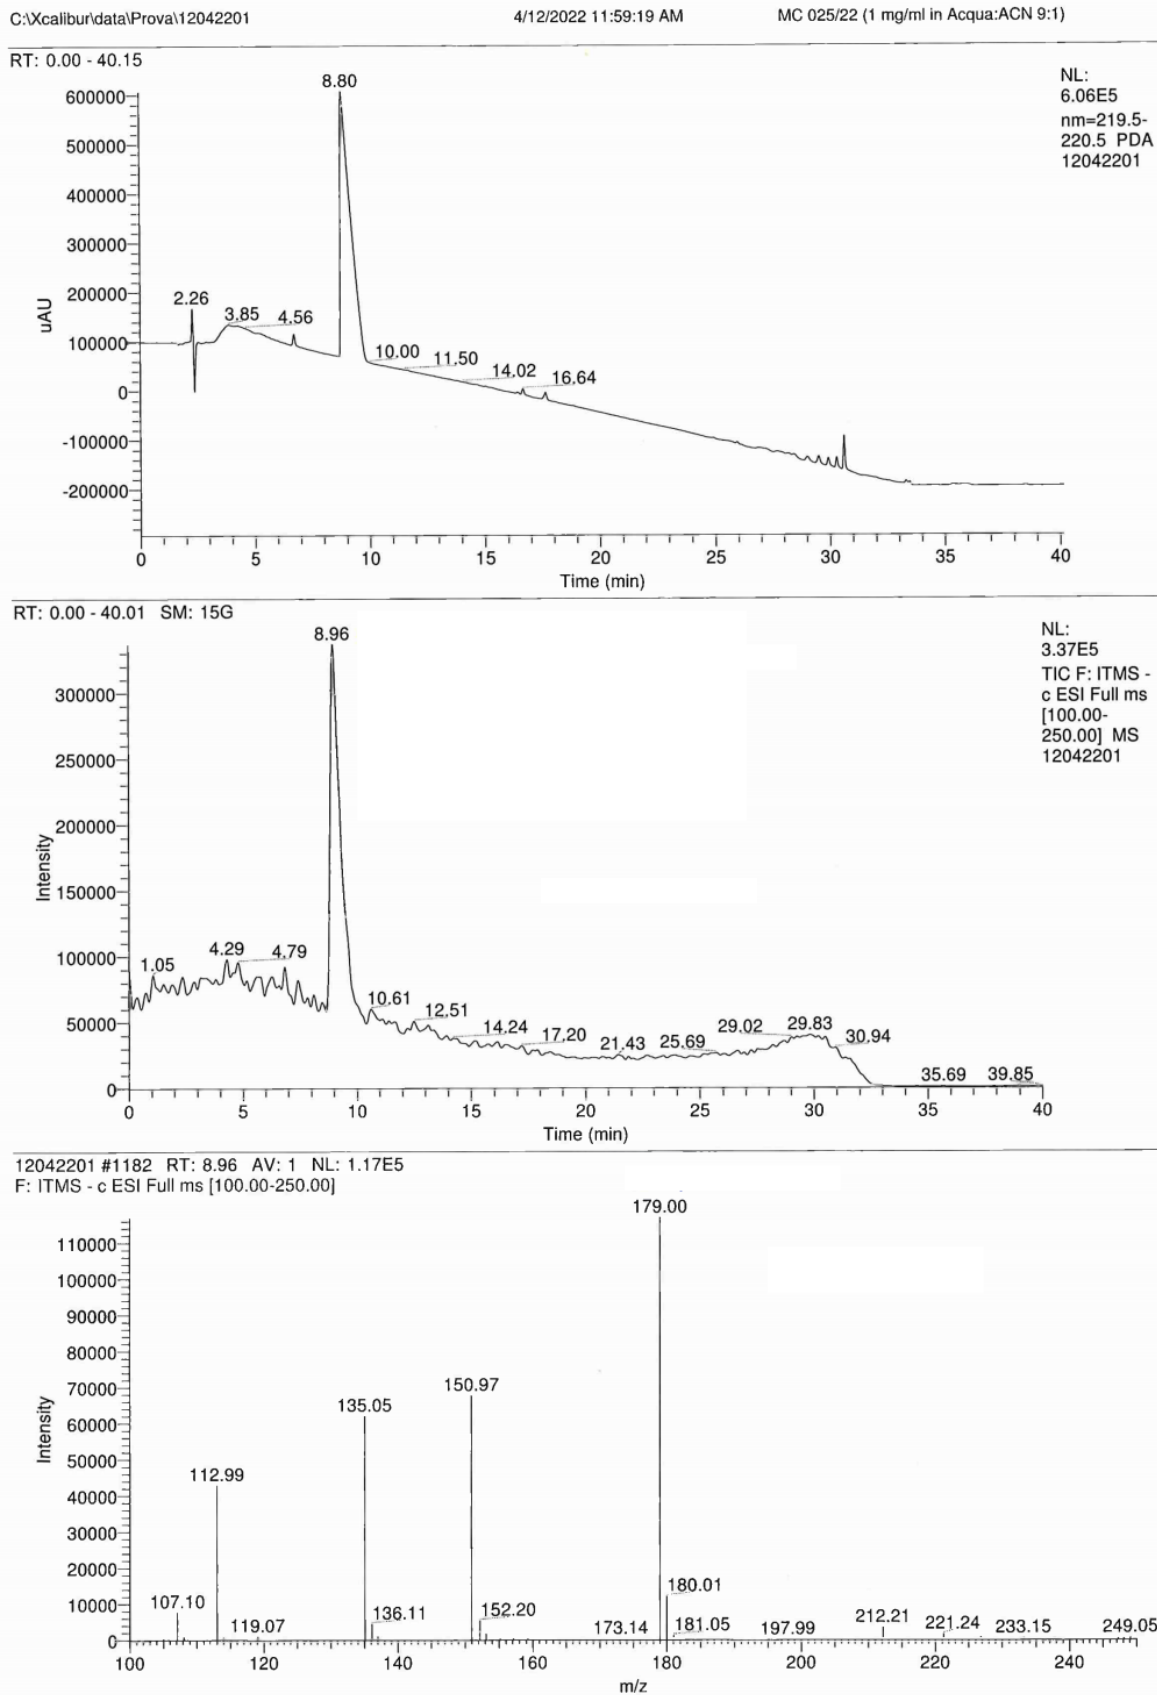

Figure S4

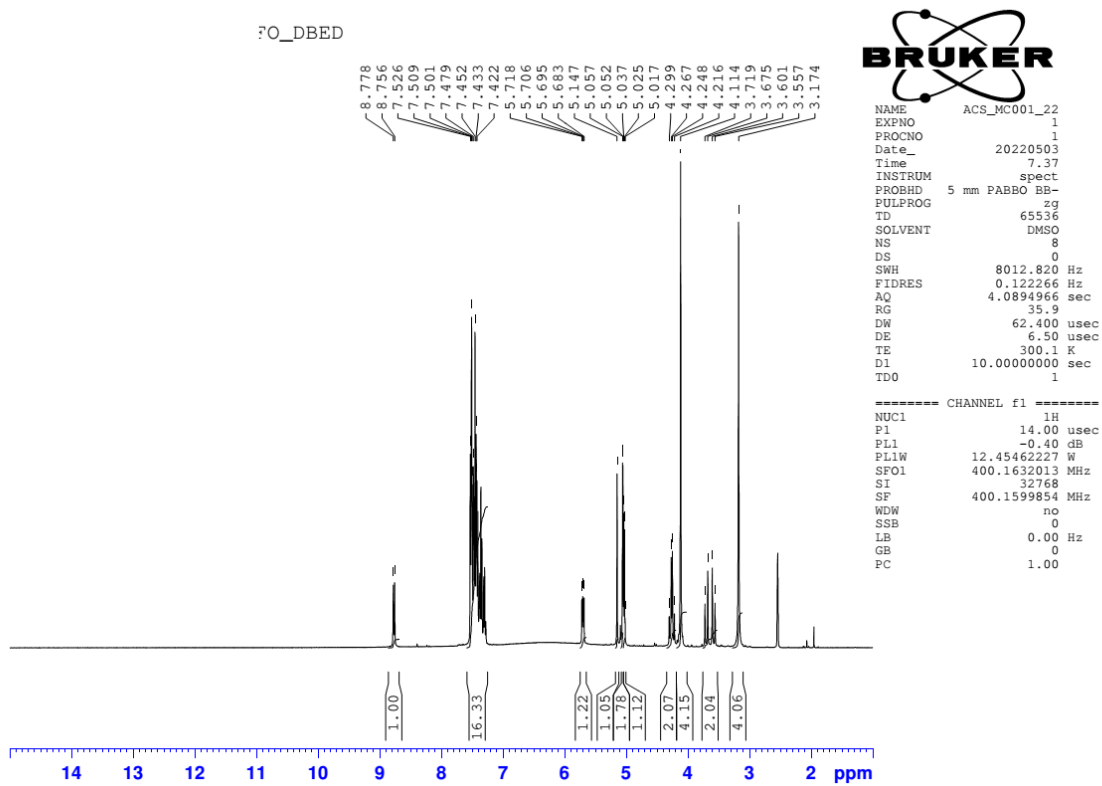

Figure S5

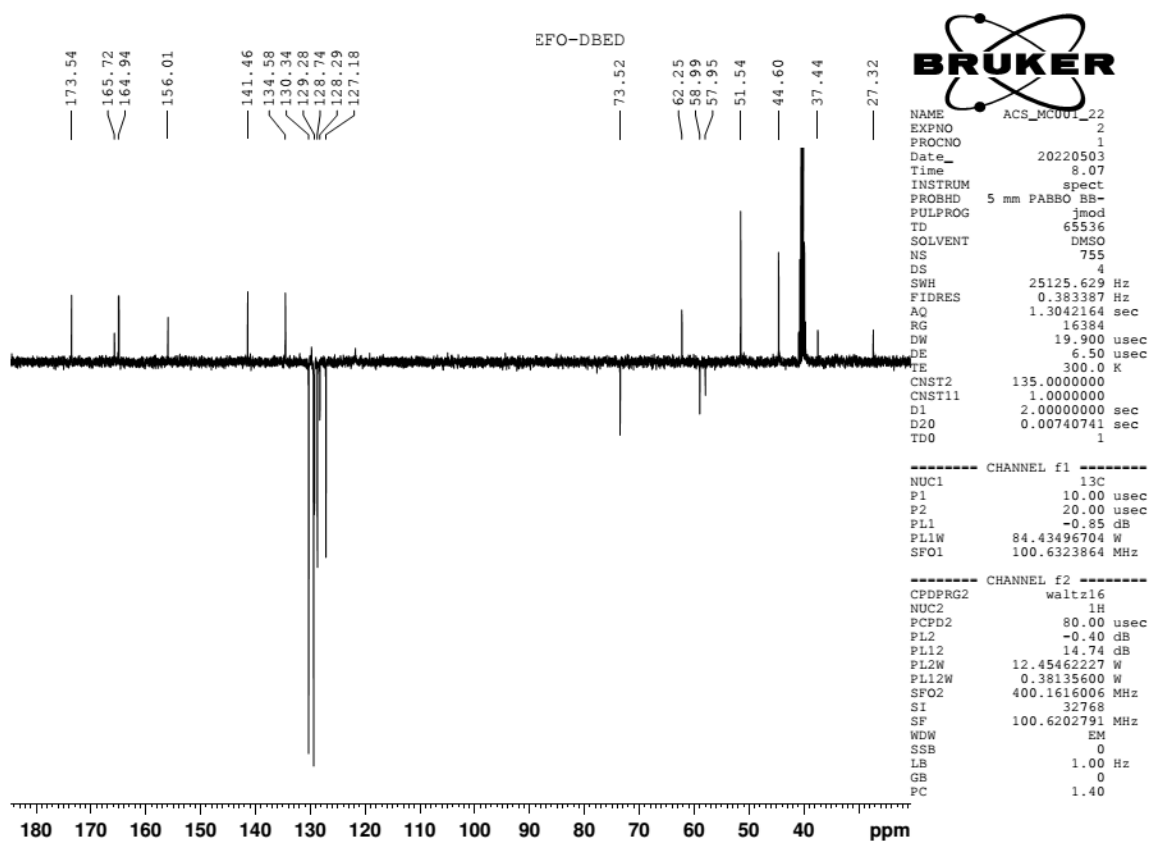

Figure S6

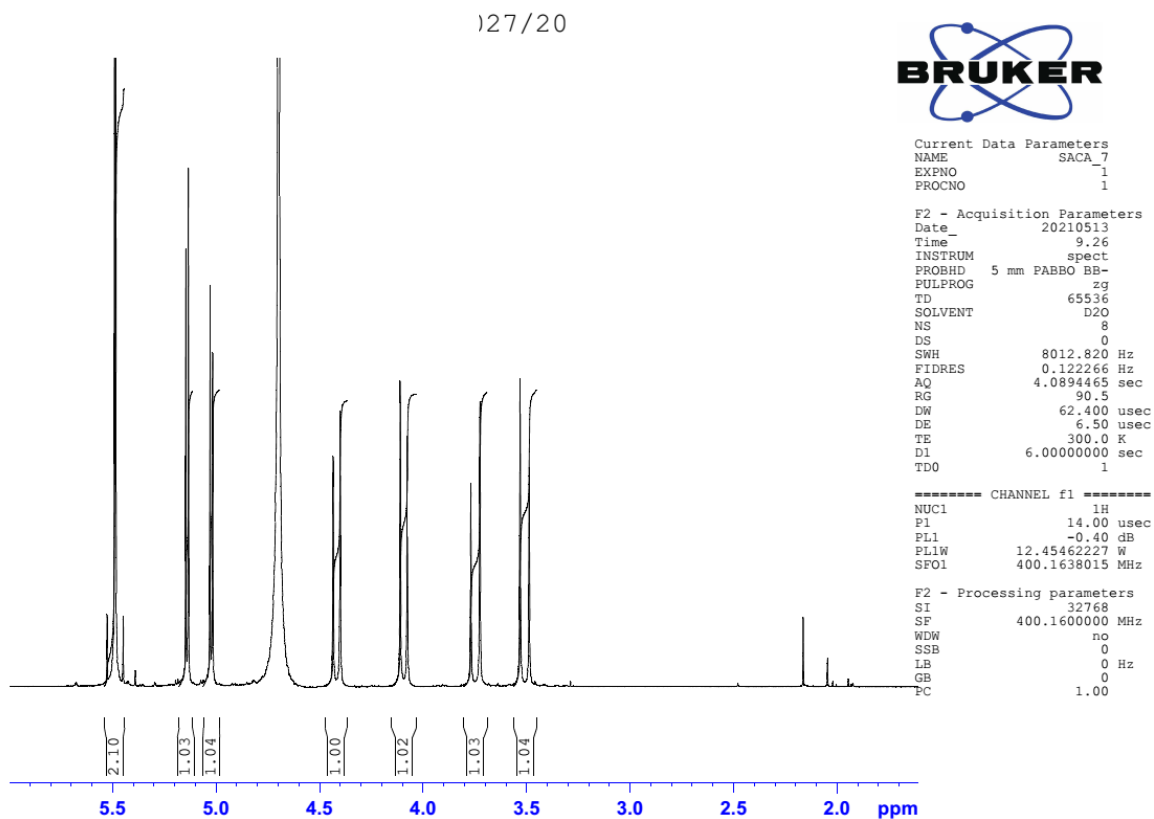

Figure S7

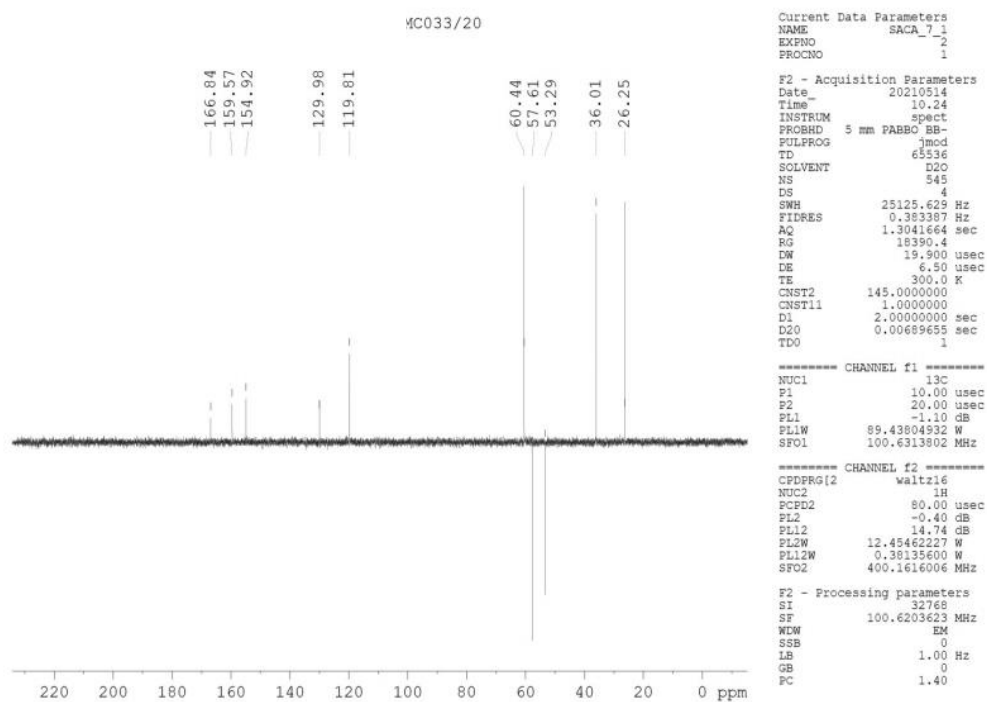

Supplement: s1 [file s1]
